# Supplementary material for: A novel capsule-based self-recovery system with a chloride ion trigger
Source: PubMed Central journal article supplement (PMC4458884; doi:10.1038/srep10866), 2015-06-08
Supplement: srep10866-s1.pdf [file srep10866-s1.pdf]

## Supplementary Information

### **A novel capsule-based self-recovery system with chloride ions trigger**

Wei Xiong<sup>1,2,3</sup>, Jiaoning Tang<sup>2</sup>, Guangming Zhu<sup>2</sup>, Ningxu Han<sup>1</sup>, Erik Schlangen<sup>3</sup>, Biqin Dong<sup>1</sup>, Xianfeng Wang<sup>1</sup> & Feng Xing<sup>1,\*</sup>

<sup>1</sup>Department of Civil Engineering, Guangdong Provincial Key Laboratory of Durability for Marine Civil Engineering, Shenzhen University, Shenzhen 518060, PR China, <sup>2</sup>Shenzhen Key Laboratory of Special Functional Materials, College of Materials Science and Engineering, Shenzhen University, Shenzhen 518060, PR China, <sup>3</sup>Delft University of Technology, Faculty of Civil Engineering and Geosciences, Micromechanics Laboratory (MICROLAB), Stevinweg 1, 2628 CN Delft, The Netherlands.

*\*Email address:* xingf@szu.edu.cn

### **Movies**

*Movie S1:* Chloride ions triggering process.

*Movie S2:* X-ray CT 3D modeling of original concrete matrix embedded with Ag-alg capsules.

*Movie S3:* X-ray CT 3D modeling of the concrete matrix soaked into NaCl solution.



**Figure S1.** The disadvantages of current healing technology



**Figure S2.** Schematic of Ag-alginate capsules encapsulated oil cores.



**Figure S3.** FTIR spectra of Na-alg and Ag-alg.



**Figure S4.** The size distribution of the Ag-alg beads and Ag-alg capsules.



**Figure S5.** FESEM images of a) Ag-alginate capsule b) the surface of the capsule c) the capsule added NaCl aqueous solution d) the surface after triggering process



**Figure S6.** FESEM-EDS compositional elements analysis and mapping images of the Ag-alg capsule



**Figure S7.** FESEM-EDS compositional elements analysis and mapping images of the Ag-alg capsule exposed to chloride ions.



**Figure S8.** a) XPS survey spectra of Ag-alg. b) High-resolution XPS spectra of Ag 3d in Ag-alg.



**Figure S9.** The triggering time of Ag-alginate capsules added with different concentration of NaCl solution.



**Figure S10.** The concrete specimen embedded with chloride ions responsive Ag-alg capsules
